# Supplementary material
Source: PubMed Central journal article supplement (PMC4731118)
Supplement: ASN.2014121184_ASN2014121184SupplementaryData.pdf [file ASN.2014121184_ASN2014121184SupplementaryData.pdf]

## **Supplemental Information**

**(6 figures and 1 table)**

### **Erythropoietin Synthesis in Renal Myofibroblasts Is Restored by Activation of Hypoxia Signaling**

Tomokazu Souma, Masahiro Nezu, Daisuke Nakano, Shun Yamazaki, Ikuo Hirano,

Hiroki Sekine, Takashi Dan, Kotaro Takeda, Guo-Hua Fong, Akira Nishiyama,

Sadayoshi Ito, Toshio Miyata, Masayuki Yamamoto and Norio Suzuki

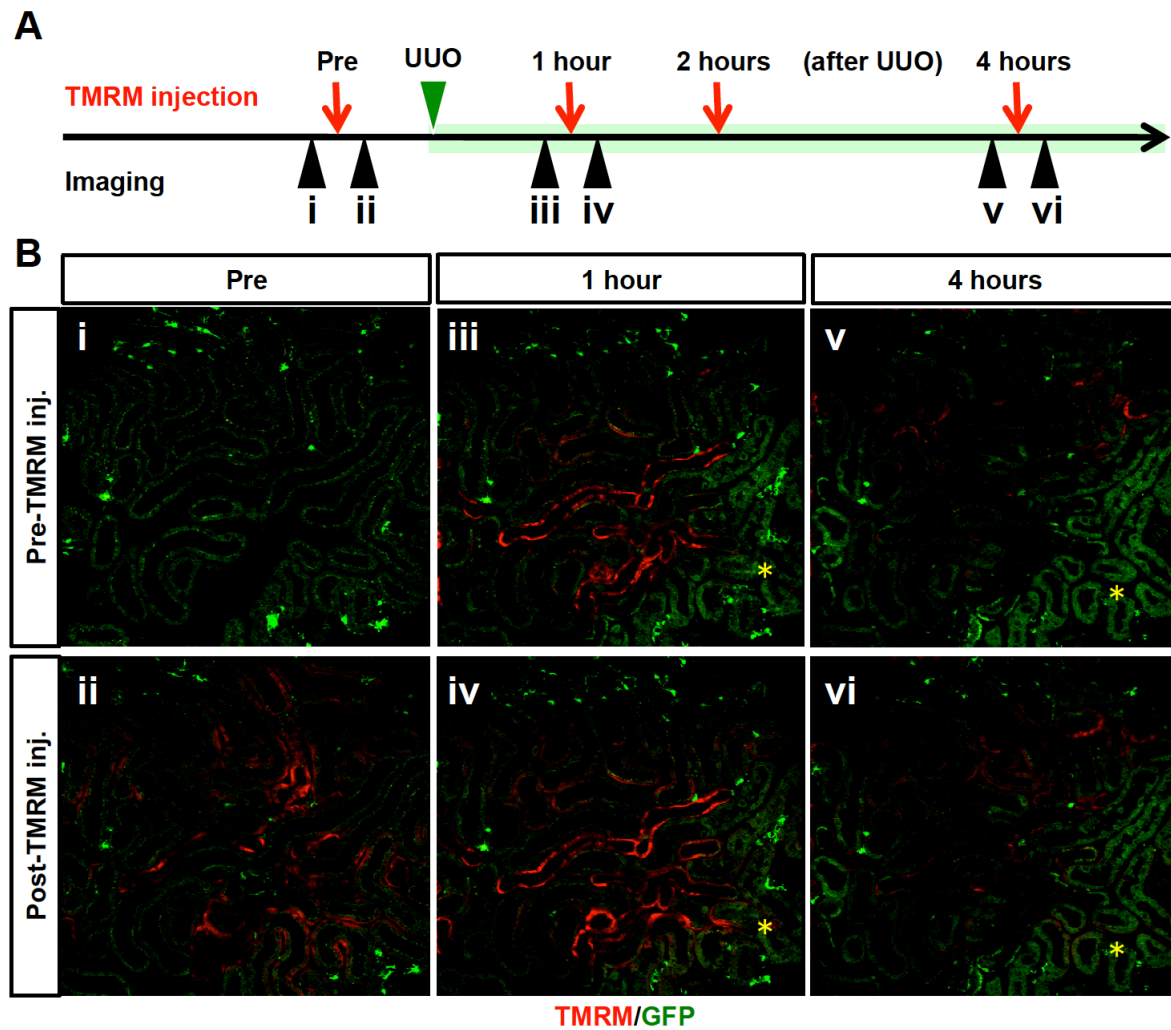

**Supplemental Figure 1. Decrease in mitochondrial membrane potential upon injury in ISAM kidneys.** (A) Schematic protocol for detecting mitochondrial membrane potential in ISAM kidneys by two-photon microscopic imaging at indicated time points (i-vi) before and after UVO treatment. To detect mitochondrial membrane potential, TMRM dye was intravenously injected into ISAM at the indicated time points. (B) Activity of the *Epo*-gene transcription (GFP, bright green spots) and mitochondrial membrane potential (TMRM, red) in ISAM kidneys at time points indicated in A (i-vi) are shown. Asterisks indicate green auto-fluorescence in tubules. Note that red fluorescence of TMRM was diminished within 4 hours after UVO treatment even with the additional injection of TMRM (vi). GFP signals of ON-REPs are mainly distributed in oxygen-poor areas negative for TMRM signals.

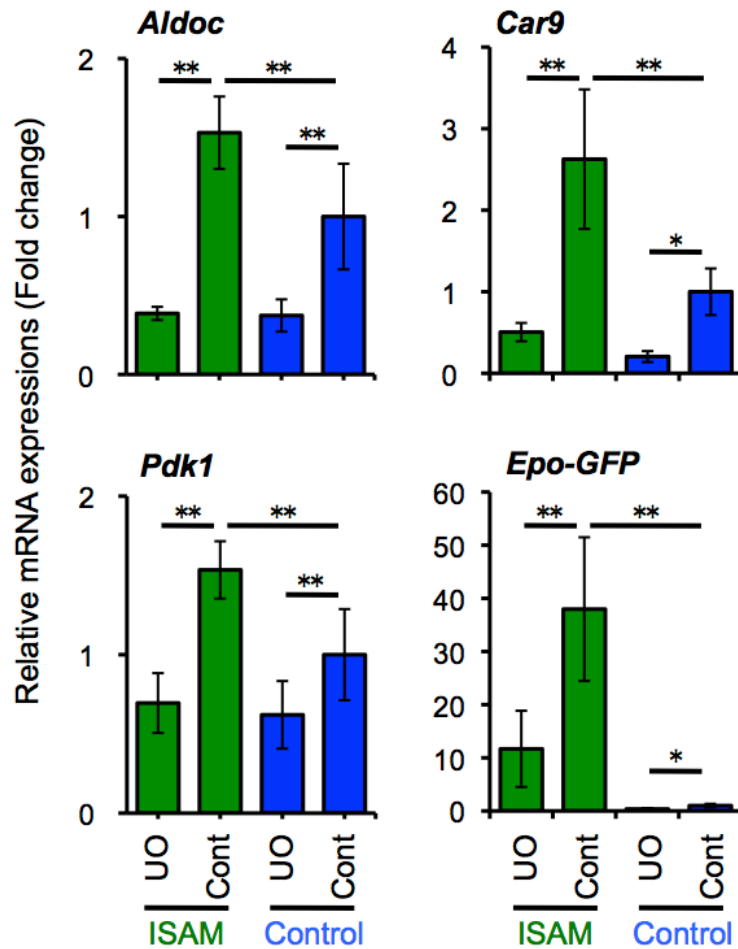

### Supplemental Figure 2. Expression of hypoxia-inducible genes in kidneys upon injury.

For validation of Figure 3B, RT-qPCR analyses of the indicated genes in the ureteral obstructed (UO) and contralateral (Cont) kidneys of ISAM ( $Epo^{GFP/GFP}::Tg^{Epo3'}$  genotype) or the control littermate mice ( $Epo^{GFP/wt}::Tg^{Epo3'}$  genotype) were conducted at 2 days after UUO treatment. Data from the contralateral kidneys of control mice were set as 1 (mean $\pm$ s.d.). \* $P$ <0.05, \*\* $P$ <0.01 (n=4) by one-way ANOVA with Tukey-Kramer test for multiple comparisons.

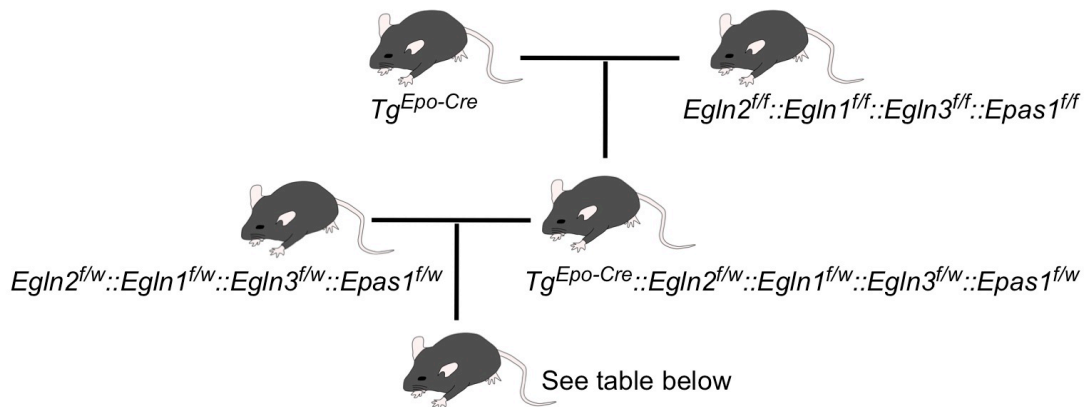

| Gene         | Protein       | Nomenclature   | Genotype                                                                                                                          |
|--------------|---------------|----------------|-----------------------------------------------------------------------------------------------------------------------------------|
| <i>Egln1</i> | PHD2          | Control (Cre-) | Mice without <i>Tg<sup>Epo-Cre</sup></i>                                                                                          |
| <i>Egln2</i> | PHD1          | Control (Cre+) | Mice with <i>Tg<sup>Epo-Cre</sup></i> and each heterozygous allele                                                                |
| <i>Egln3</i> | PHD3          | P1-EKO         | <i>Tg<sup>Epo-Cre</sup>::Egln2<sup>f/f</sup>::Egln1<sup>f/w</sup>::Egln3<sup>f/w</sup>::Epas1<sup>w/w</sup> or <sup>f/w</sup></i> |
| <i>Epas1</i> | HIF2 $\alpha$ | P2-EKO         | <i>Tg<sup>Epo-Cre</sup>::Egln2<sup>f/w</sup>::Egln1<sup>f/f</sup>::Egln3<sup>f/w</sup>::Epas1<sup>w/w</sup> or <sup>f/w</sup></i> |
|              |               | P3-EKO         | <i>Tg<sup>Epo-Cre</sup>::Egln2<sup>f/w</sup>::Egln1<sup>f/w</sup>::Egln3<sup>f/f</sup>::Epas1<sup>w/w</sup> or <sup>f/w</sup></i> |
|              |               | P12-EKO        | <i>Tg<sup>Epo-Cre</sup>::Egln2<sup>f/f</sup>::Egln1<sup>f/w</sup>::Egln3<sup>f/w</sup>::Epas1<sup>w/w</sup> or <sup>f/w</sup></i> |
|              |               | P13-EKO        | <i>Tg<sup>Epo-Cre</sup>::Egln2<sup>f/f</sup>::Egln1<sup>f/w</sup>::Egln3<sup>f/f</sup>::Epas1<sup>w/w</sup> or <sup>f/w</sup></i> |
|              |               | P23-EKO        | <i>Tg<sup>Epo-Cre</sup>::Egln2<sup>f/w</sup>::Egln1<sup>f/f</sup>::Egln3<sup>f/f</sup>::Epas1<sup>w/w</sup> or <sup>f/w</sup></i> |
|              |               | P123-EKO       | <i>Tg<sup>Epo-Cre</sup>::Egln2<sup>f/f</sup>::Egln1<sup>f/f</sup>::Egln3<sup>f/f</sup>::Epas1<sup>w/w</sup> or <sup>f/w</sup></i> |
|              |               | P123H2-EKO     | <i>Tg<sup>Epo-Cre</sup>::Egln2<sup>f/f</sup>::Egln1<sup>f/f</sup>::Egln3<sup>f/f</sup>::Epas1<sup>f/f</sup></i>                   |
|              |               | H2-EKO         | <i>Tg<sup>Epo-Cre</sup>::Epas1<sup>f/f</sup></i>                                                                                  |

**Supplemental Figure 3. Breeding strategy for Epo-producing cell-specific targeting of genes for PHDs and HIF2 $\alpha$ .**

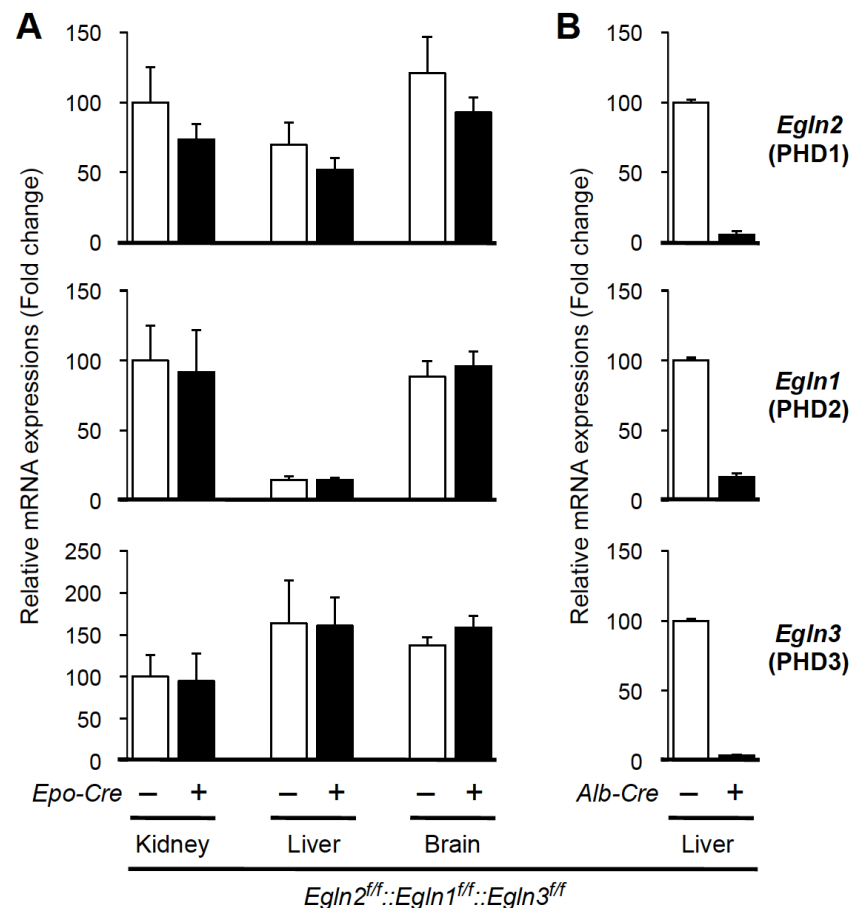

**Supplemental Figure 4. Expression of genes for PHDs in kidneys, livers, and brains.** (A) Gene-targeting efficiency by the *Epo-Cre* transgene. RT-qPCR analyses of genes for PHDs were conducted using P123-EKO (*Epo-Cre*<sup>+</sup>) and the control (*Epo-Cre*<sup>-</sup>) littermate mice. (B) Expression levels of genes for PHDs in livers by the *Alb-Cre* transgene. Data from the kidneys (A) or livers (B) of control mice were set as 100 (mean±s.d., n=4). The data indicate that the recombination efficiency of the *Epo-Cre* transgene is very low in whole organ samples, whereas the recombinant efficacy of the *Alb-Cre* transgene, which expresses Cre recombinase exclusively in hepatocytes, is very high.<sup>1</sup> These findings are consistent with our previous reports showing that *Epo-Cre*-mediated recombination is induced in a small fraction of total REPs under physiological conditions,<sup>2,3</sup> and that the population of total REPs is less than 5% of the cells in a whole kidney.<sup>3</sup> Therefore, significant changes in levels of mRNAs for PHDs in individual *Epo-Cre*-expressing cells were not observed in whole kidney samples from P123-EKO mice. Polycythemia may be caused by continuous Epo production in a small number of PHD-deficient REPs even though the induction is undetectable in whole kidney samples.

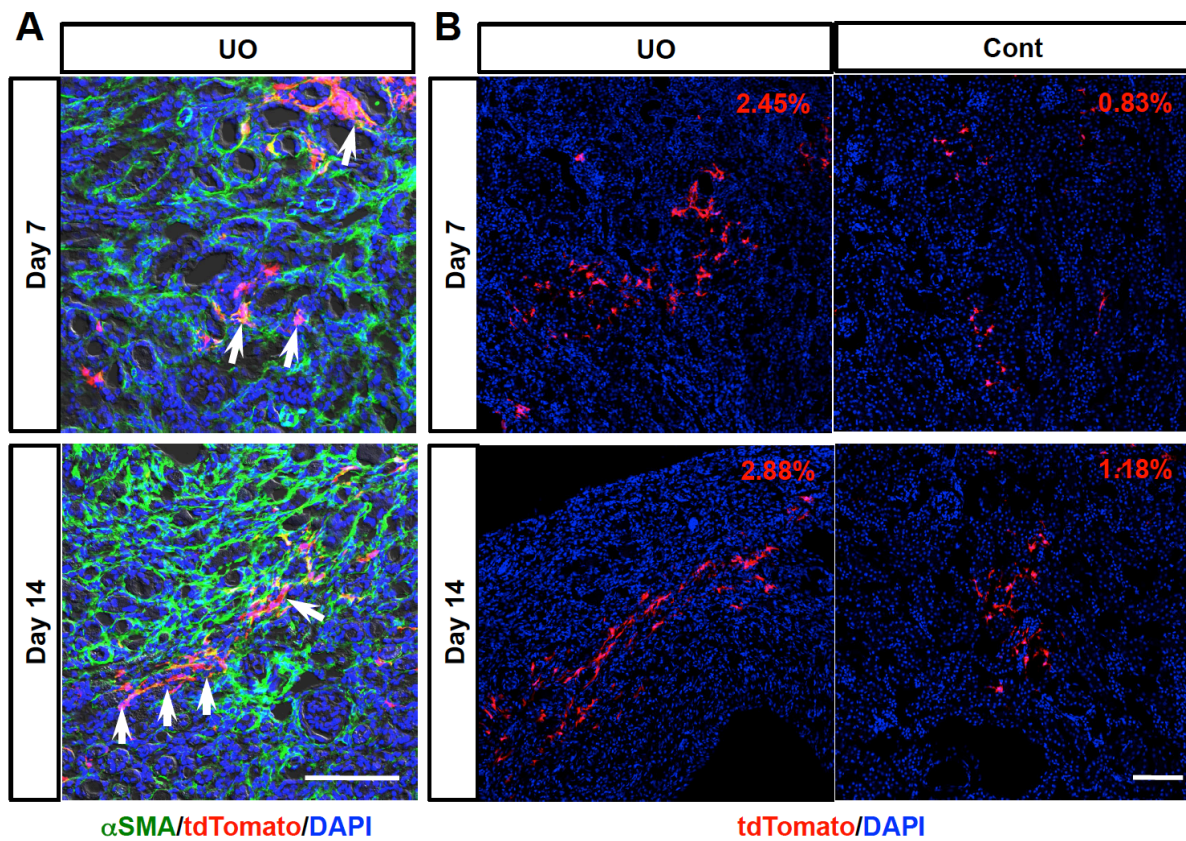

**Supplemental Figure 5. Enrichment of MF-REPs in injured kidneys by long-term UO treatment.** (A) REPs were tagged and traced with tdTomato expression (red) in kidneys of *R26T::Tg<sup>Epo-Cre</sup>* mice.<sup>2</sup> Cryo-sections of kidneys subjected to ureteral obstruction (UO) for 7 and 14 days were stained with  $\alpha$ SMA antibodies (green), followed by counterstaining with DAPI (blue). Note that *Epo-Cre*-tagged cells (positive for tdTomato expression) were also positive for  $\alpha$ SMA (arrow). (B) Enrichment of *Epo-Cre*-tagged cells (red, MF-REPs) in kidneys of *R26T::Tg<sup>Epo-Cre</sup>* mice by UO-injury for 7 and 14 days. The percentages of *Epo-Cre*-tagged cells in a cryo-section were calculated relative to DAPI-positive total cells. Scale bars: 100  $\mu$ m.



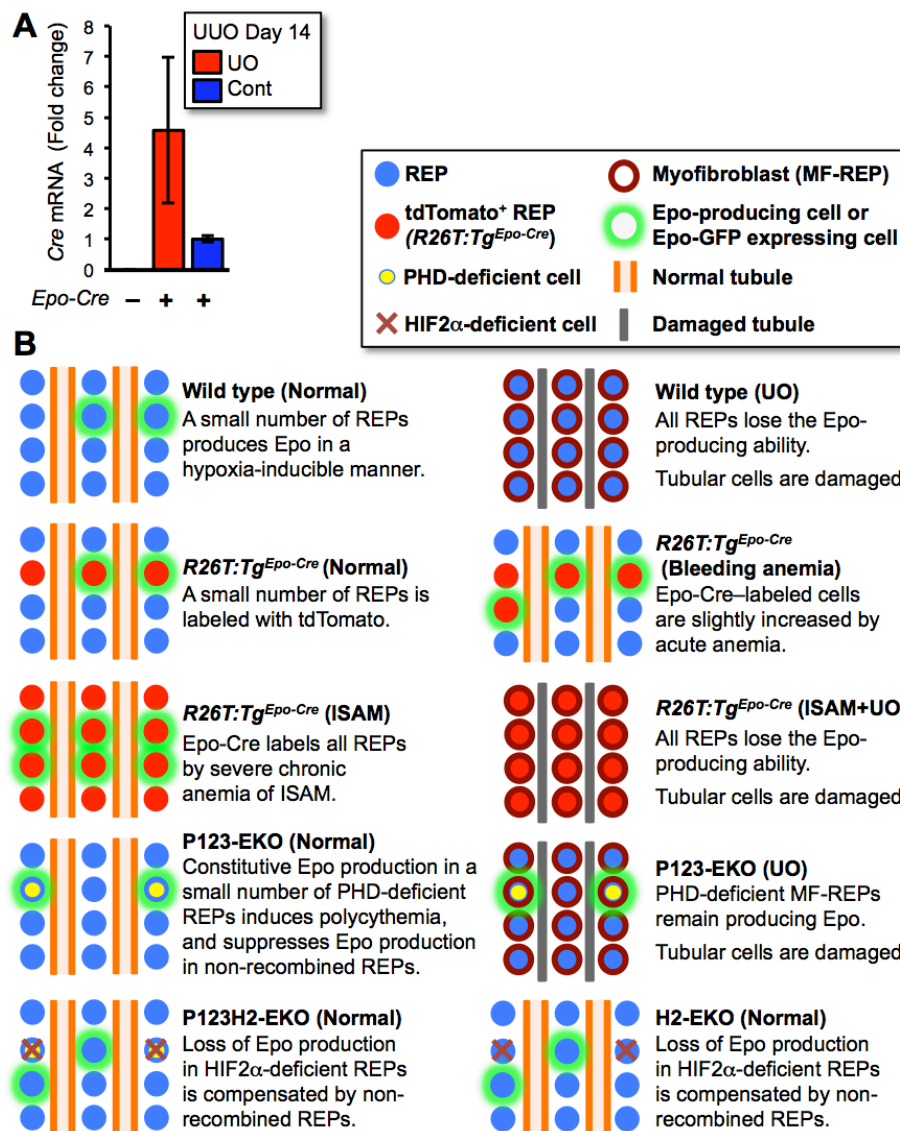

### Supplemental Figure 6. The dynamics of Epo-Cre-mediated recombination. (A)

Expression of the *Epo-Cre* transgene in kidneys from P123-EKO ( $Cre^+$ ) and littermate control ( $Cre^-$ ) mice at 14 days after UUO treatment. Data from the Cont kidneys were set as 1 (mean $\pm$ s.d., n=3). Similar to the endogenous *Epo*-gene expression, the *Epo-Cre* transgene expression, which is directed by the *Epo*-gene regulatory elements in the BAC-based transgene, is higher in UO-kidneys than the Cont kidneys in P123-EKO mice. (B) A schema of Epo-Cre-mediated recombination in normal, anemic, and injured kidneys. Epo-Cre is active only in a small subset of total REPs in *R26T:Tg<sup>Epo-Cre</sup>* mice. The activity is slightly enhanced by acute anemia, and almost all REPs are labeled in chronic severe anemia of ISAM.<sup>2,3</sup> The *Epo*-gene expression from P123-EKO kidneys is not higher than that of the control mouse kidneys (see Figure 4E), probably due to suppression of the *Epo*-gene expression in non-recombined REPs by polycythemia of P123-EKO mice. PHD-deficient REPs retain the Epo-producing ability after myofibroblastic transformation.

**Supplemental Table 1. Oligo-nucleotide sequences used in this study.**

For real-time PCR with SYBR Green

| Gene           | Sense primer            | Antisense primer        |
|----------------|-------------------------|-------------------------|
| <i>Epo-GFP</i> | GGTGGATCCTAAAGCAGCAG    | GAAGACTTGCAGCGTGGAC     |
| <i>Acta2</i>   | CCCACCCAGAGTGGAGAA      | ACATAGCTGGAGCAGCGTCT    |
| <i>Coll1a1</i> | AGACATGTTTCAGCTTTGTGGAC | GCAGCTGACTTCAGGGATG     |
| <i>Col3a1</i>  | TCCCCTGGAATCTGTGAATC    | TGAGTCGAATTGGGGAGAAT    |
| <i>Il6</i>     | CTGCAAGAGACTTCCATCCAG   | AGTGGTATAGACAGGTCTGTTGG |
| <i>Tnfa</i>    | ATGAGAAGTTCCTCAAATGGCC  | CCTCCACTTGGTGGTTTGCTA   |
| <i>Tgfb1</i>   | TGGAGCAACATGTGGAATC     | CAGCAGCCGGTTACCAAG      |
| <i>Itgam</i>   | ATGGACGCTGATGGCAATACC   | TCCCATTACGCTCTCCA       |
| <i>Ptprc</i>   | GATTGCTGATGAGGGCAGAC    | CTGAATACCCGTGGAATGCT    |
| <i>Emr1</i>    | CCTGGACGAATCCTGTGAAG    | GGTGGGACCACAGAGAGTTG    |
| <i>Pdk1</i>    | GTTGAAACGTCCCGTGCT      | GCGTGATATGGGCAATCC      |
| <i>Vegfa</i>   | CAGGCTGCTGTAACGATGAA    | CTATGTGCTGGCTTTGGTGA    |
| <i>Car9</i>    | GCGGATCCACCCGATGGGGA    | TGACTGTGGCCACCCCTTT     |
| <i>Ldha</i>    | CGCCCCCATCGT            | GTTGCCATCTTGGACTTTGAATC |
| <i>Aldoc</i>   | CGTAGGCATCAAGGTTGACA    | GAGCACAGCGTTCCAAGAG     |
| <i>Egln1</i>   | TAAACGGCCGAACGAAAGC     | GGGTATCAACGTGACGGACA    |
| <i>Egln2</i>   | ATGGCTCACGTGGACGCAGTAA  | CATTGCCTGGATAACACGCCAC  |
| <i>Egln3</i>   | CTATGTCAAGGAGCGGTCCAA   | GTCCACATGGCGAACATAACC   |
| <i>Epo-Cre</i> | ACGTTACCGGCATCAACGT     | CTGCATTACCGGTCGATGCA    |

For real-time PCR primers with Taqman probe

| Gene        | Sense primer                                | Antisense primer                                       |
|-------------|---------------------------------------------|--------------------------------------------------------|
| <i>rRNA</i> | CGGCTACCACATCCAAGGAA<br>(FAM-labeled probe  | GCTGGAATTACCGCGGCT<br>TGCTGGCACCAGACTTGCCCTC)          |
| <i>Epo</i>  | GAGGCAGAAAATGTCACGATG<br>(FAM-labeled probe | CTTCCACCTCCATTCTTTTCC<br>TGCAGAAGGTCCAGACTGAGTGAAAATA) |

For mouse genotyping

| Gene                      | Sense primer                 | Antisense primer             |
|---------------------------|------------------------------|------------------------------|
| <i>Egln1</i>              | CAAATGGAGATGGAAGATGC         | TCAACTCGAGCTGGAAACC          |
| <i>Egln2</i>              | TGGGCGCTGCATCACCTGTATCT      | ACTGGTGAAGCCTGTAGCCTGTC      |
| <i>Egln3</i>              | ATGGCCGCTGTATCACCTGTAT       | CCACGTTAACTCTAGAGCCACTGA     |
| <i>Epas1</i>              | CAGGCAGTATGCCTGGCTAATTCCAGTT | CTTCTTCCATCATCTGGGATCTGGGACT |
| <i>Tg<sup>Epo3'</sup></i> | ACAGGAAGGTCTCACATAGCC        | TACAGCTAGGAGAGTTGTGTGG       |
| <i>GFP</i>                | CTGAAGTTCATCTGCACCACC        | GAAGTTGTACTCCAGCTTGTGC       |
| <i>Cre</i>                | ACGTTACCGGCATCAACGT          | CTGCATTACCGGTCGATGCA         |
| <i>R26T</i>               | CTGTTCTGTACGGCATGG           | GGCATTAAAGCAGCGTATCC         |



## Supplemental References:

1. Postic, C, Shiota, M, Niswender, KD, Jetton, TL, Chen, Y, Moates, JM, Shelton, KD, Lindner, J, Cherrington, AD, Magnuson, MA: Dual roles for glucokinase in glucose homeostasis as determined by liver and pancreatic beta cell-specific gene knock-outs using Cre recombinase. *J Biol Chem*, 274: 305-315, 1999.
2. Yamazaki, S, Souma, T, Hirano, I, Pan, X, Minegishi, N, Suzuki, N, Yamamoto, M: A mouse model of adult-onset anaemia due to erythropoietin deficiency. *Nat Commun*, 4: 1950, 2013.
3. Souma, T, Yamazaki, S, Moriguchi, T, Suzuki, N, Hirano, I, Pan, X, Minegishi, N, Abe, M, Kiyomoto, H, Ito, S, Yamamoto, M: Plasticity of renal erythropoietin-producing cells governs fibrosis. *J Am Soc Nephrol*, 24: 1599-1616, 2013.
